# Supplementary material for: How topoisomerase IV can efficiently unknot and decatenate negatively supercoiled DNA molecules without causing their torsional relaxation
Source: PubMed Central journal article supplement — Nucleic Acids Res. 2016 Apr 22;44(10):4528–38. doi: 10.1093/nar/gkw311 (PMC4889953; doi:10.1093/nar/gkw311), 2016-04-22
Supplement: supp_gkw311_nar-00848-f-2016-File009.pdf [file supp_gkw311_nar-00848-f-2016-File009.pdf]

## Supplementary Material

### A

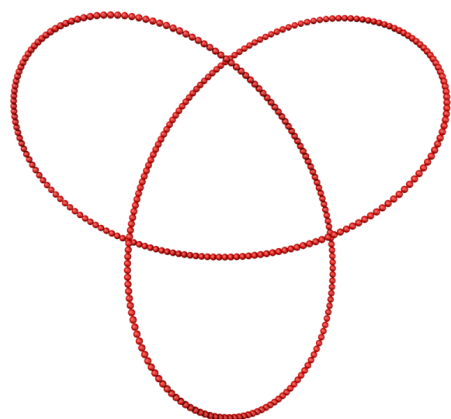

### B

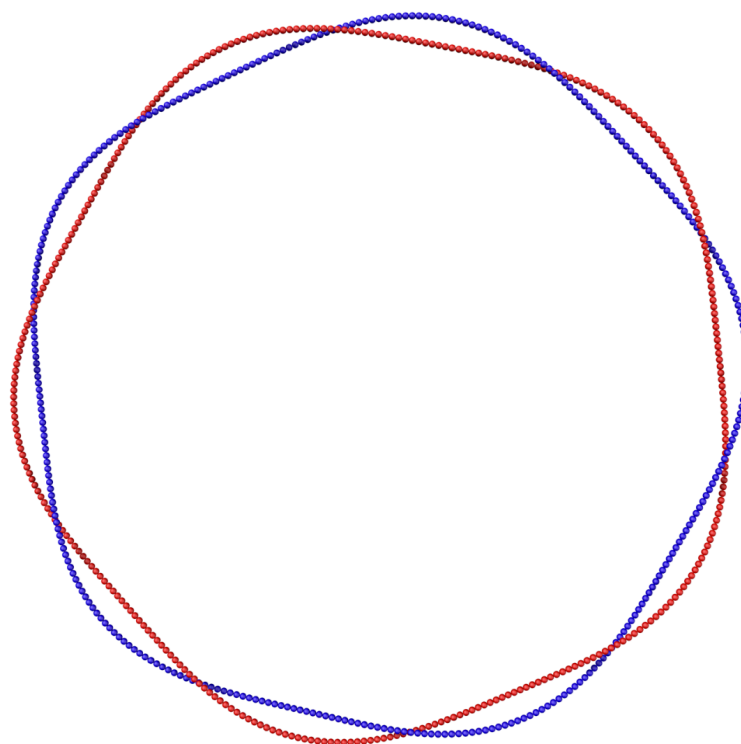

Figure S1. Initial configurations of right-handed trefoil knot with the topological notation  $3_1$  (A), and of a torus type, right-handed catenane with the topological notation  $10_1^2$  (B). In Metropolis Monte Carlo simulations the configurations were equilibrated assuming that each ring was supercoiled to  $\Delta Lk = -16$ .

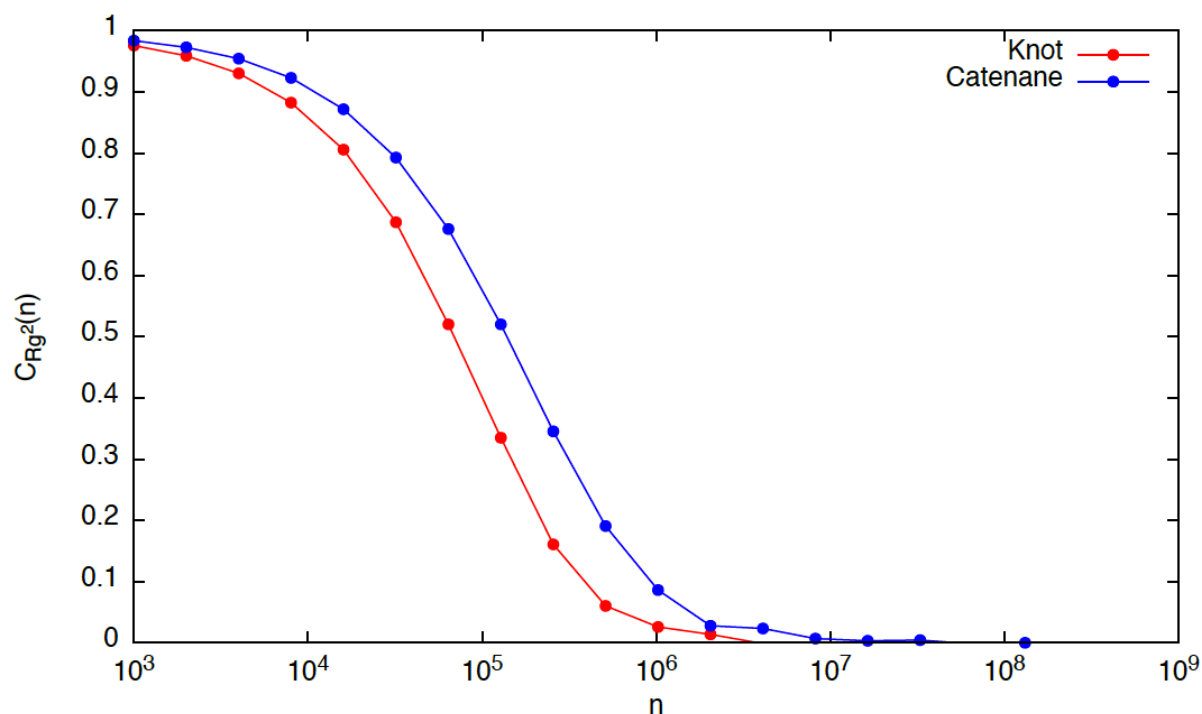

Figure S2. Autocorrelation function of the squared radius of gyration as a function of block size  $n$  for supercoiled knotted chains (red) and supercoiled catenated chains (blue).
